# Supplementary material for: Glutathione-stabilized palladium nanozyme for colorimetric assay of silver(i) ions
Source: Royal Society of Chemistry journal article supplement (doi:10.1039/c5an01103e), 2015-01-01
Supplement: c5an01103e1.pdf [file c5an01103e1.pdf]

## Supporting Information

Table S1 Recovery experiments of Ag<sup>+</sup> in diluted lake water

| Spiked (nM) | Detected (nM) <sup>a</sup> | Recovery (%) | Detected (nM) <sup>b</sup> |
|-------------|----------------------------|--------------|----------------------------|
| 0           | 5.8±1.2                    |              | <9.26                      |
| 20          | 30.1±2.8                   | 121.5        | 14.81                      |
| 50          | 61.5±5.5                   | 111.4        | 43.15                      |
| 80          | 79.4±4.2                   | 92.0         | 75.83                      |

<sup>a</sup> Detected by colorimetric method proposed in this study;

<sup>b</sup> Detected by ICPMS.

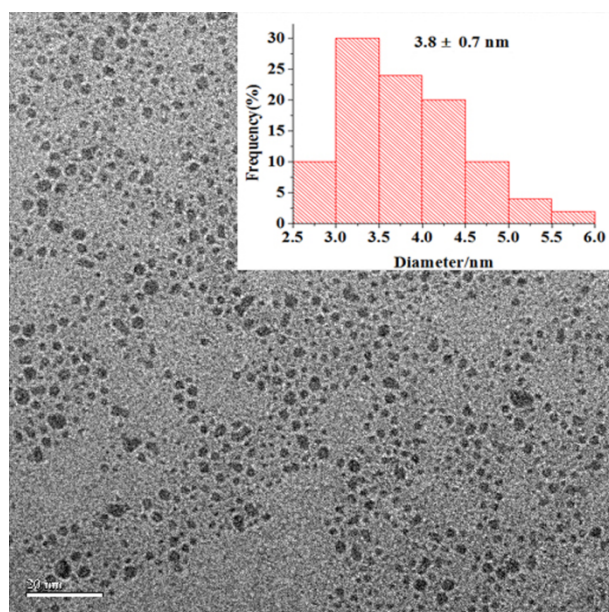

Fig. S1 TEM image of GSH-Pd reduced by  $\text{NaBH}_4$  ( $[\text{Na}_2\text{PdCl}_4]/[\text{GSH}]=6$ ,  $[\text{NaBH}_4]/[\text{Na}_2\text{PdCl}_4]=2$ ).

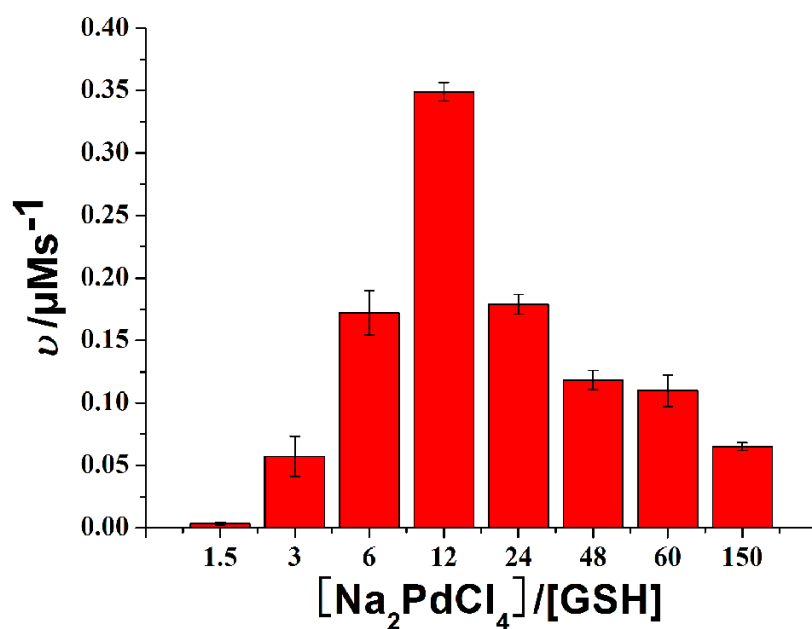

Fig. S2 The initial rate ( $v$ ) of TMB- $\text{H}_2\text{O}_2$  reaction system catalyzed by GSH-Pd prepared at different molar ratio of  $[\text{Na}_2\text{PdCl}_4]/[\text{GSH}]$ .

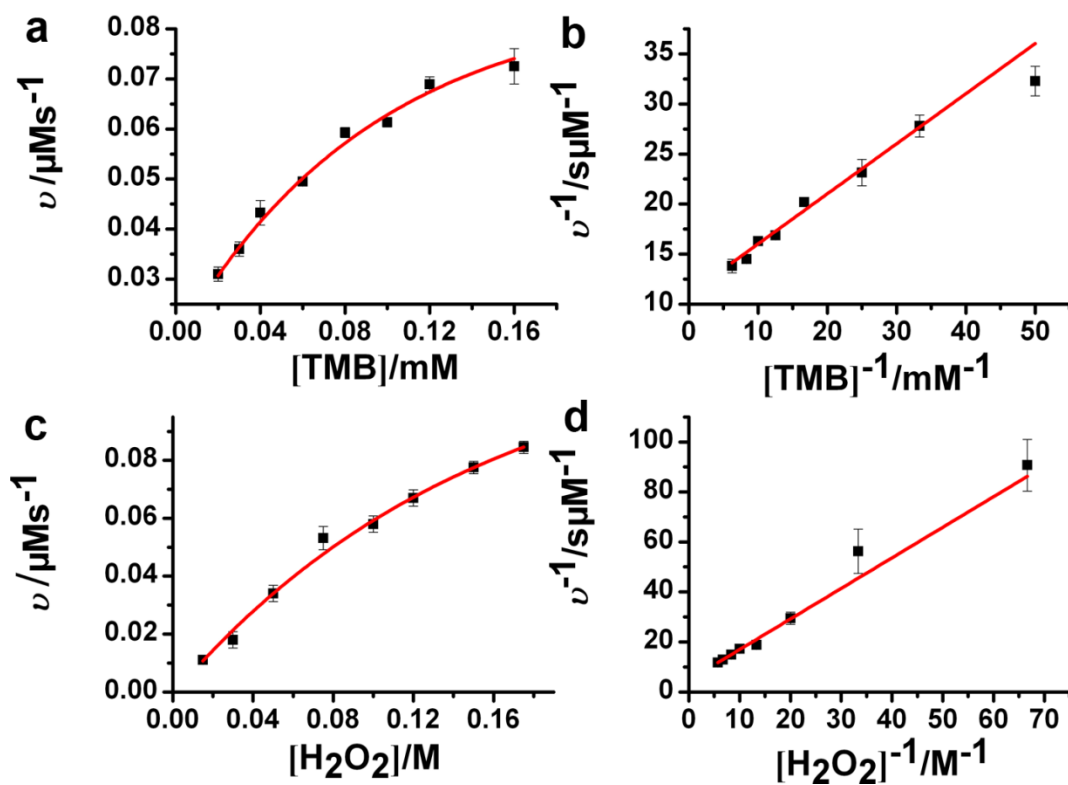

Fig. S3 Steady-state kinetics of GSH-Pd1.4 were measured through the oxidization of TMB by  $\text{H}_2\text{O}_2$  at 20 °C using 900 nM Pd (calculated from precursor): (a) The concentration of  $\text{H}_2\text{O}_2$  was fixed at 125 mM and the TMB concentration was varied, (c) The concentration of TMB was fixed at 0.125 mM and the  $\text{H}_2\text{O}_2$  concentration was varied. (b) and (d) are double-reciprocal plots of (a) and (c), respectively.

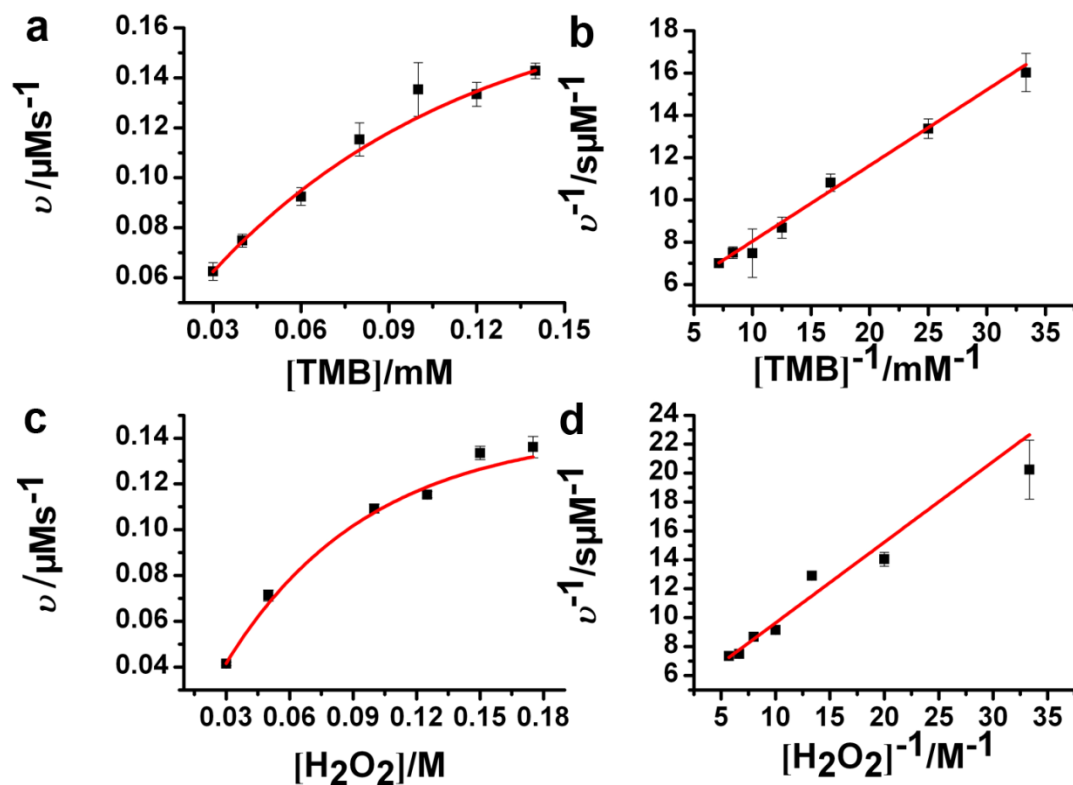

Fig. S4 Steady-state kinetics of GSH-Pd3.5 were measured through the oxidization of TMB by  $\text{H}_2\text{O}_2$  at 20 °C using 900 nM Pd (calculated from precursor): (a) The concentration of  $\text{H}_2\text{O}_2$  was fixed at 125 mM and the TMB concentration was varied, (c) The concentration of TMB was fixed at 0.125 mM and the  $\text{H}_2\text{O}_2$  concentration was varied. (b) and (d) are double-reciprocal plots of (a) and (c), respectively.

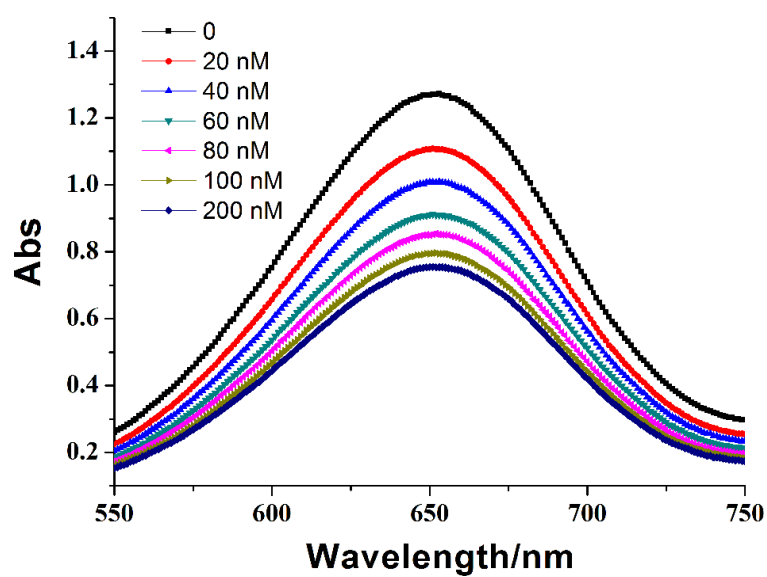

Fig. S5 UV absorption spectra of  $\text{H}_2\text{O}_2$ -mediated oxidation of TMB catalyzed GSH-Pd<sub>2.6</sub> in the presence of different concentration of  $\text{Ag}^+$ . Each spectrum was collected at 10 min after initiation.

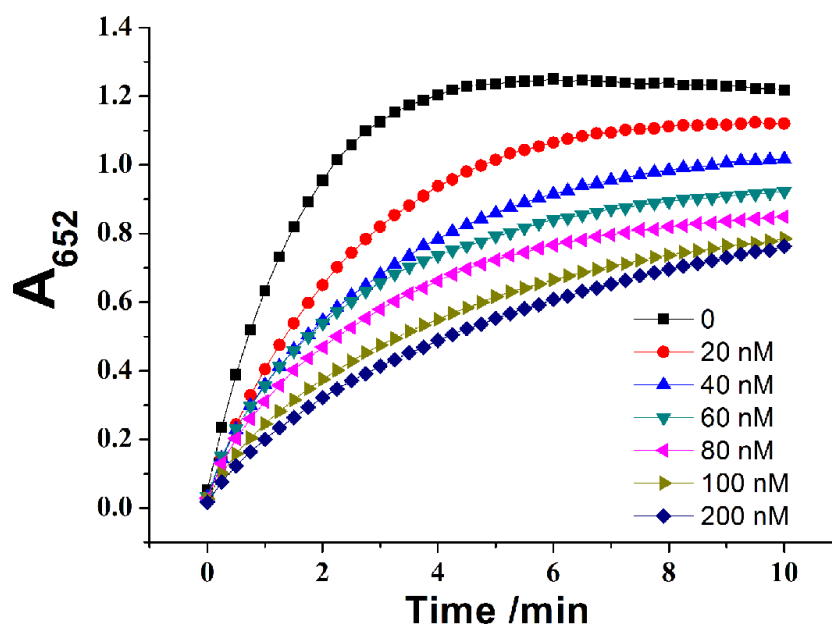

Fig. S6 UV-vis kinetics of  $\text{H}_2\text{O}_2$ -mediated oxidation of TMB catalyzed GSH-Pd<sub>2.6</sub> in the presence of different concentration of  $\text{Ag}^+$ .

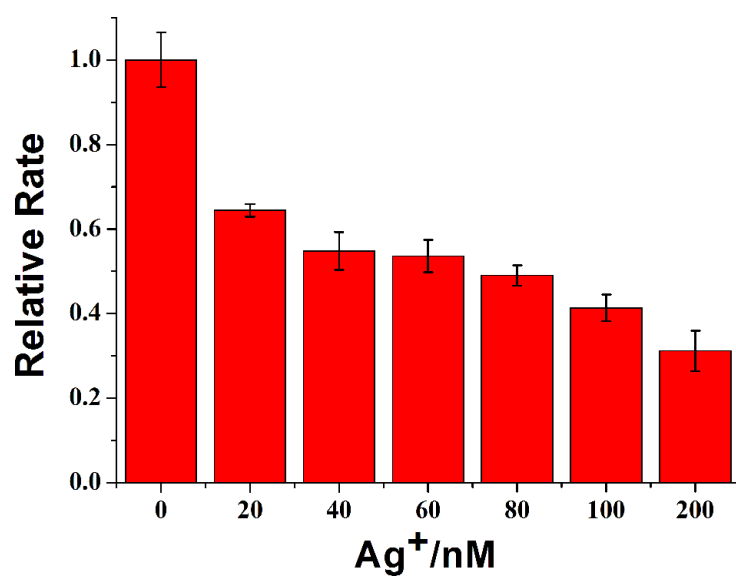

Fig. S7 Relative rate of TMB-H<sub>2</sub>O<sub>2</sub> reaction system catalyzed by GSH-Pd<sub>2.6</sub> in the presence of different concentration of Ag<sup>+</sup>.

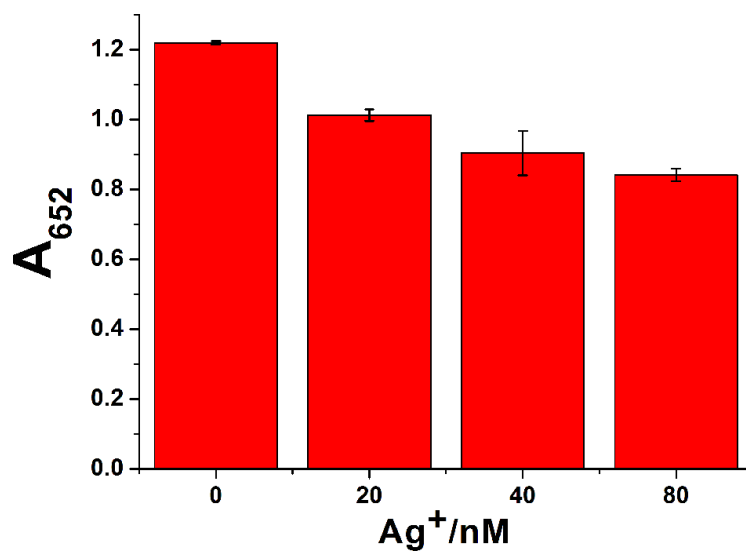

Fig. S8 The A<sub>652</sub> in the TMB-H<sub>2</sub>O<sub>2</sub> reaction catalyzed by GSH-Pd<sub>2.6</sub> in the presence of Ag<sup>+</sup> with 5 μM NaCl added.

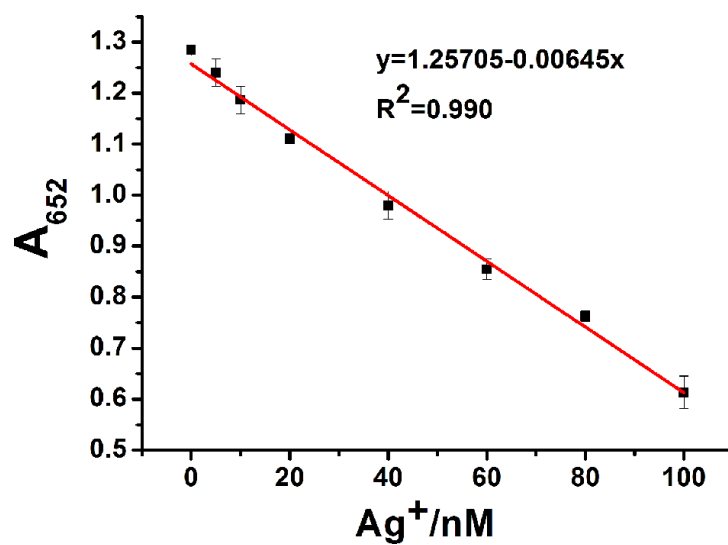

Fig. S9 The calibration curve for  $\text{Ag}^+$  in the presence of  $1\ \mu\text{M}$  EDTA.

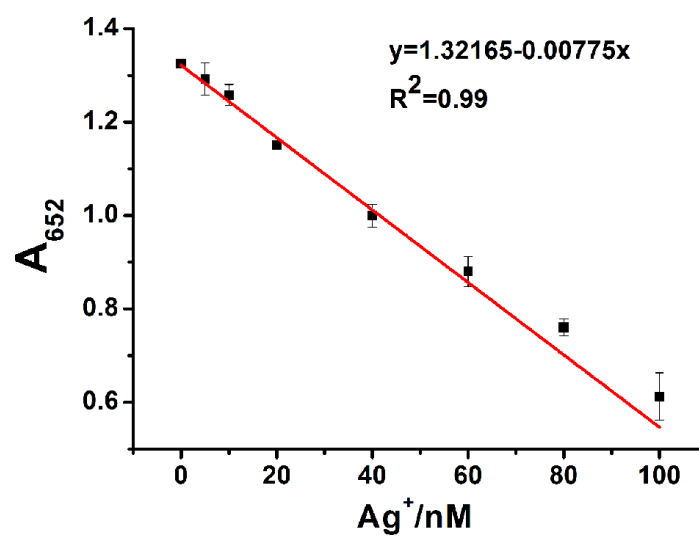

Fig. S10 The calibration curve for  $\text{Ag}^+$  in the presence of  $500\ \text{nM}$   $\text{Hg}^{2+}$  and  $1\ \mu\text{M}$  EDTA.

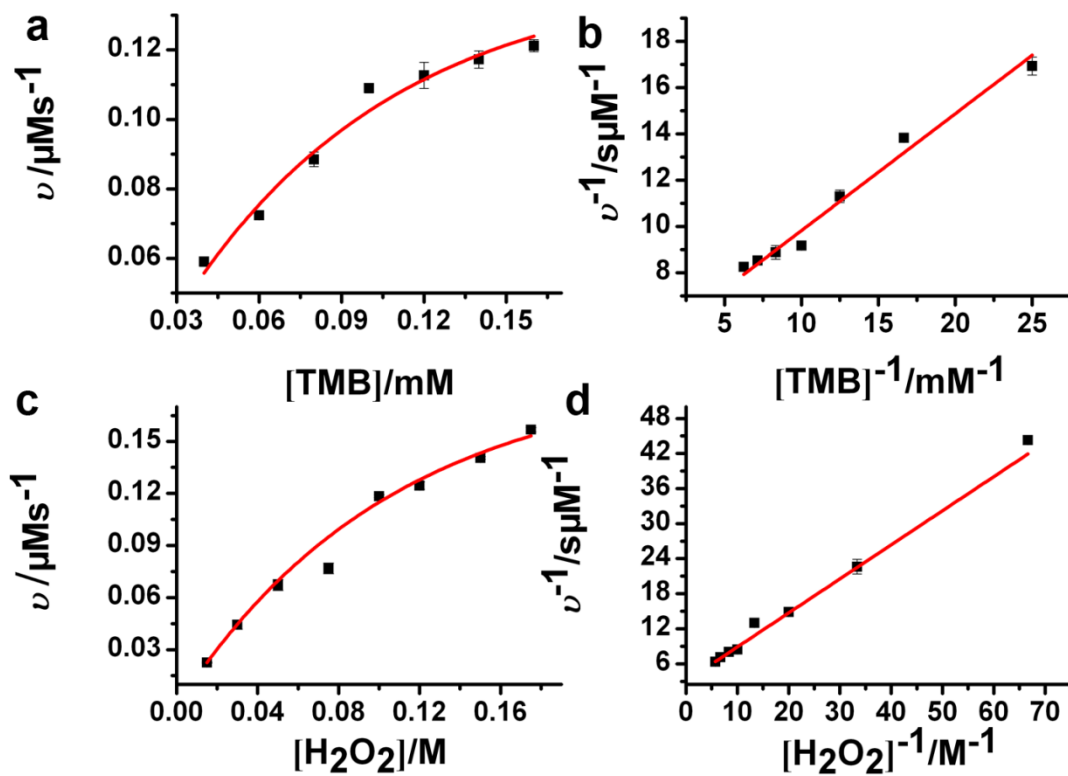

Fig. S11 Steady-state kinetics of GSH-Pd2.6 were measured using 900 nM Pd in the presence of 100 nM  $\text{Ag}^+$ : (a) The concentration of  $\text{H}_2\text{O}_2$  was fixed at 125 mM and the TMB concentration was varied, (c) The concentration of TMB was fixed at 0.125 mM and the  $\text{H}_2\text{O}_2$  concentration was varied. (b) and (d) are double-reciprocal plots of (a) and (c), respectively.



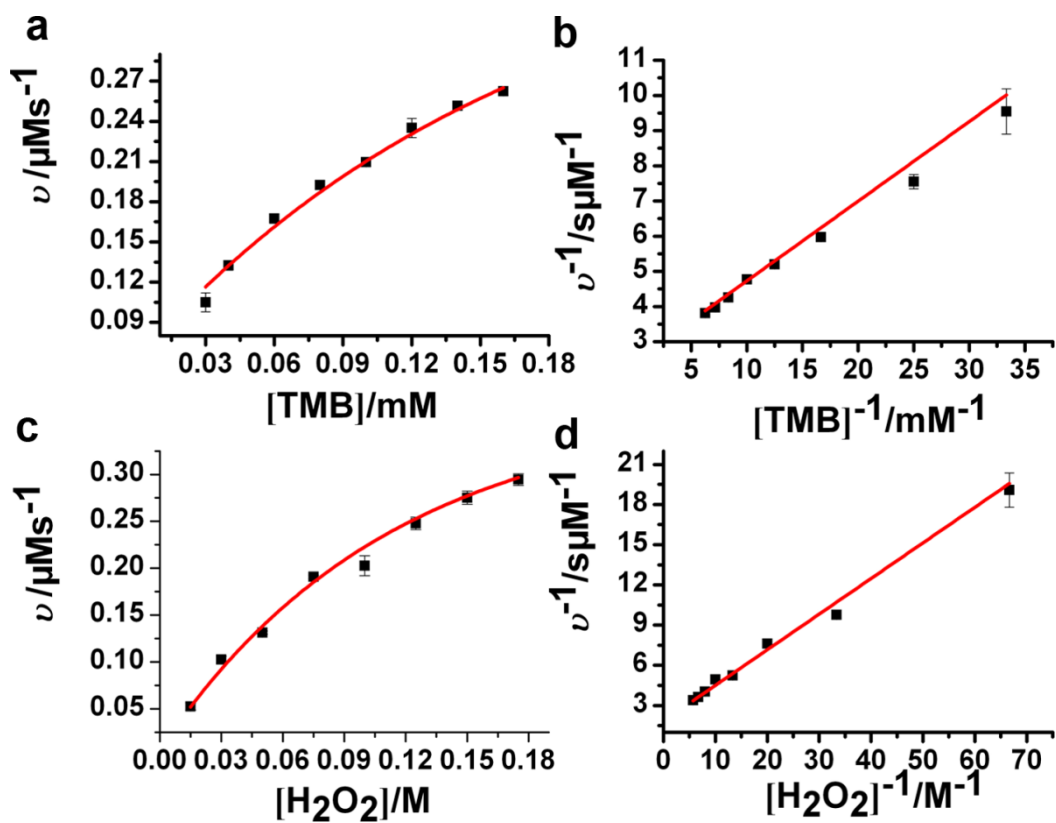

Fig. S12 Steady-state kinetics of GSH-Pd2.6 were measured using 900 nM Pd in the presence of 1  $\mu\text{M}$   $\text{Hg}^{2+}$ : (a) The concentration of  $\text{H}_2\text{O}_2$  was fixed at 125 mM and the TMB concentration was varied, (c) The concentration of TMB was fixed at 0.125 mM and the  $\text{H}_2\text{O}_2$  concentration was varied. (b) and (d) are double-reciprocal plots of (a) and (c), respectively.

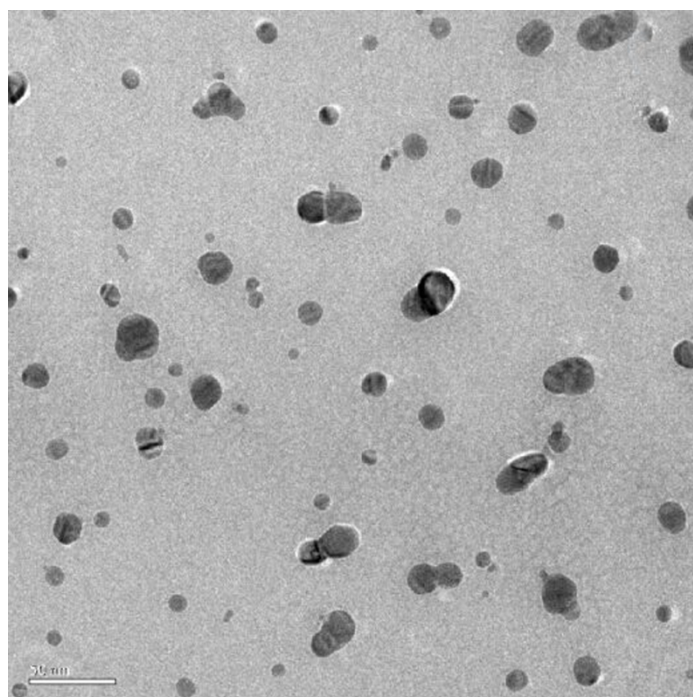

Fig. S13 TEM image of as-prepared citrate-capped Ag nanoparticles.

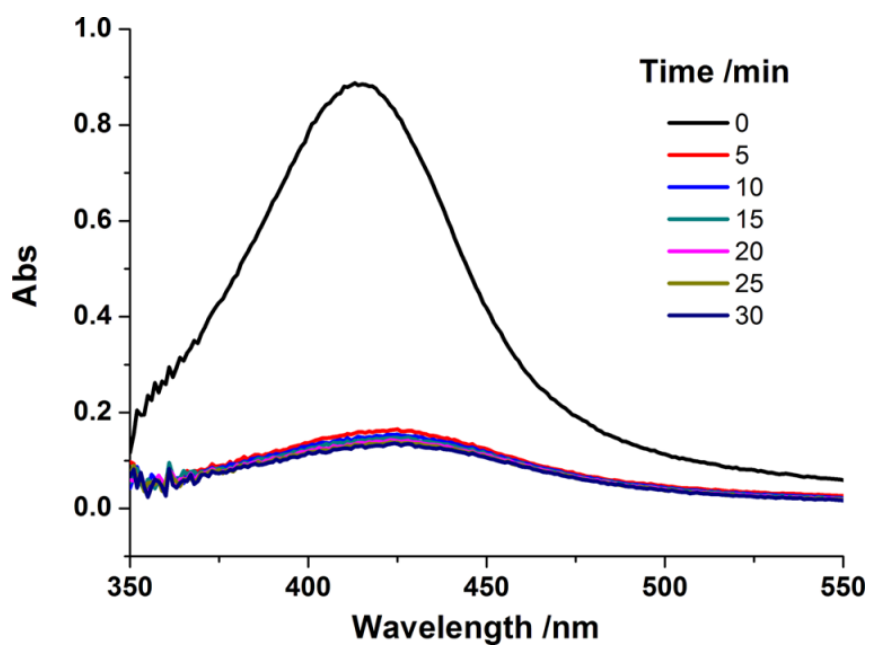

Fig. S14 Time-dependent UV-vis spectra of H<sub>2</sub>O<sub>2</sub>-mediated oxidation of 100 μM Ag nanoparticles (calculated from Ag<sup>+</sup> precursor) at 25 °C.

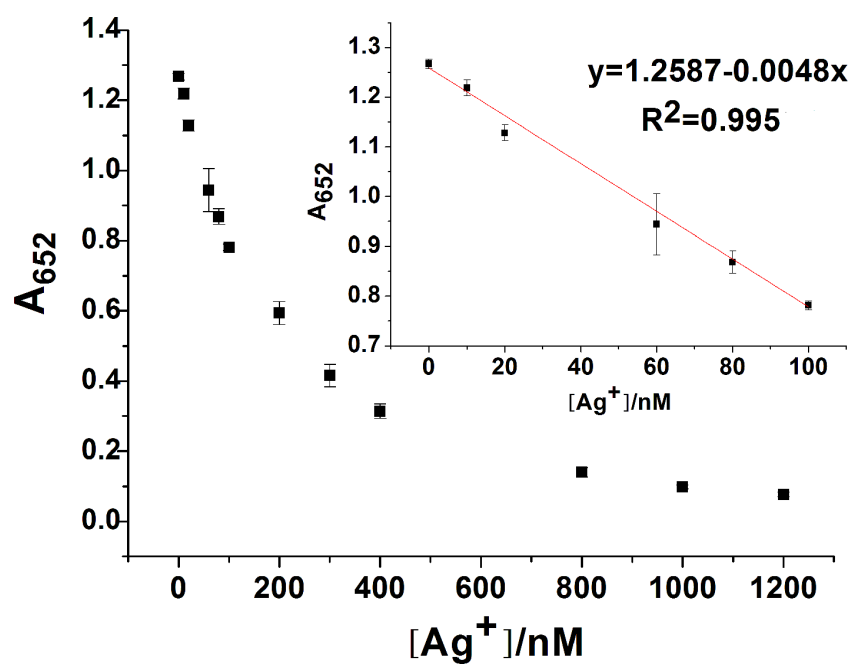

Fig. S15 Plots of the  $A_{652}$  with the concentration of Ag nanoparticles (calculated from  $Ag^+$  precursor), and the inset is the corresponding calibration curve. The reaction system contains 0.125 mM TMB, 125 mM  $H_2O_2$  and 900 nM GSH-Pd2.6. The  $A_{652}$  was collected at 10 min after initiation.
